# Supplementary material for: Enhanced C2 and C3 Product Selectivity in Electrochemical CO2 Reduction on Carbon-Doped Copper Oxide Catalysts Prepared by Deep Eutectic Solvent Calcination
Source: MDPI journal article supplement (doi:10.3390/catal11050542), 2021-04-23
Supplement: s1 [file s1]

Archive with 1 entries (1 files):
- catalysts-1190093-supplementary.pdf
